RESEARCH ARTICLE

# Preoperative indication for systemic therapy extended to patients with early-stage breast cancer using multiparametric 7-tesla breast MRI

A. M. T. Schmitz<sup>1\*</sup>, W. B. Veldhuis<sup>1</sup>, M. B. E. Menke-Pluijmers<sup>2</sup>, W. J. M. van der Kemp<sup>1</sup>, T. A. van der Velden<sup>1</sup>, M. A. Viergever<sup>1</sup>, W. P. T. M. Mali<sup>1</sup>, M. C. J. M. Kock<sup>3</sup>, P. J. Westenend<sup>4</sup>, D. W. J. Klomp<sup>1</sup>, K. G. A. Gilhuijs<sup>1</sup>

**1** Department of Radiology / Image Sciences Institute, University Medical Center Utrecht, Utrecht, the Netherlands, **2** Department of Surgery, Albert Schweitzer Hospital, Dordrecht, the Netherlands, **3** Department of Radiology, Albert Schweitzer Hospital, Dordrecht, the Netherlands, **4** Department of Pathology, Albert Schweitzer Hospital, Dordrecht, the Netherlands

\* [alexanderschmitz@outlook.com](mailto:alexanderschmitz@outlook.com)

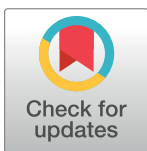

**OPEN ACCESS**

**Citation:** Schmitz AMT, Veldhuis WB, Menke-Pluijmers MBE, van der Kemp WJM, van der Velden TA, Viergever MA, et al. (2017) Preoperative indication for systemic therapy extended to patients with early-stage breast cancer using multiparametric 7-tesla breast MRI. PLoS ONE 12 (9): e0183855. <https://doi.org/10.1371/journal.pone.0183855>

**Editor:** Aamir Ahmad, University of South Alabama Mitchell Cancer Institute, UNITED STATES

**Received:** January 26, 2017

**Accepted:** August 11, 2017

**Published:** September 26, 2017

**Copyright:** © 2017 Schmitz et al. This is an open access article distributed under the terms of the [Creative Commons Attribution License](https://creativecommons.org/licenses/by/4.0/), which permits unrestricted use, distribution, and reproduction in any medium, provided the original author and source are credited.

**Data Availability Statement:** All relevant data are within the paper.

**Funding:** The study was conducted with financial support of The Dutch Pink Ribbon Foundation (<http://www.pinkribbon.nl>), grant number 9684.2011.WO36. The funder had no role in study design, data collection and analysis, decision to publish, or preparation of the manuscript.

## Abstract

### Purpose

To establish a preoperative decision model for accurate indication of systemic therapy in early-stage breast cancer using multiparametric MRI at 7-tesla field strength.

### Materials and methods

Patients eligible for breast-conserving therapy were consecutively included. Patients underwent conventional diagnostic workup and one preoperative multiparametric 7-tesla breast MRI. The postoperative (gold standard) indication for systemic therapy was established from resected tumor and lymph-node tissue, based on 10-year risk-estimates of breast cancer mortality and relapse using Adjuvant! Online. Preoperative indication was estimated using similar guidelines, but from conventional diagnostic workup. Agreement was established between preoperative and postoperative indication, and MRI-characteristics used to improve agreement. MRI-characteristics included phosphomonoester/phosphodiester (PME/PDE) ratio on 31-phosphorus spectroscopy (<sup>31</sup>P-MRS), apparent diffusion coefficients on diffusion-weighted imaging, and tumor size on dynamic contrast-enhanced (DCE)-MRI. A decision model was built to estimate the postoperative indication from preoperatively available data.

### Results

We included 46 women (age: 43-74yrs) with 48 invasive carcinomas. Postoperatively, 20 patients (43%) had positive, and 26 patients (57%) negative indication for systemic therapy. Using conventional workup, positive preoperative indication agreed excellently with positive postoperative indication (N = 8/8; 100%). Negative preoperative indication was correct in only 26/38 (68%) patients. However, <sup>31</sup>P-MRS score (p = 0.030) and tumor size (p = 0.002)

**Competing interests:** The authors have declared that no competing interests exist.

were associated with the postoperative indication. The decision model shows that negative indication is correct in 21/22 (96%) patients when exempting tumors larger than 2.0cm on DCE-MRI or with  $PME > PDE$  ratios at  $^{31}P$ -MRS.

## Conclusions

Preoperatively, positive indication for systemic therapy is highly accurate. Negative indication is highly accurate (96%) for tumors sized  $\leq 2.0$ cm on DCE-MRI and with  $PME \leq PDE$  ratios on  $^{31}P$ -MRS.

## Introduction

In the past decades, breast cancer treatment has become less invasive, for example from mastectomy to breast conserving therapy, without compromising overall disease-free survival [1,2]. Further progress in individualized treatment involves changing the order of treatment, for example preoperative radiotherapy [3] or preoperative chemotherapy [4], yielding the advantage to monitor tumor response in vivo. Also, more experimental minimally invasive tumor ablation techniques are currently investigated, such as radio-frequency ablation [5], cryoablation [6], and high-intensity focused ultrasound [7,8]. Progress is, however, hampered because the postoperative resection specimen—the golden standard for tumor characterization—is no longer available to guide treatment. Preoperative tumor biopsy, combined with conventional breast imaging, and with assessment of lymph nodes with ultrasound and fine-needle aspiration, shows discordance with postoperative assessment of the resection specimen. This discordance is as high as 40% for tumor grade and mitotic count [9,10], and impacts the ability to accurately omit systemic therapy. Consequently, current guidelines for the indication of systemic therapy cannot easily be translated to preoperative setting for early-stage breast cancer [11]. As a result, early-stage breast cancer patients do not benefit from the advantages of neoadjuvant treatments tailored to the response of cancer. Hence, more accurate preoperative characterization is desirable to reach the same level of confidence as that from a resection specimen.

Magnetic resonance imaging (MRI) visualizes several aspects of tumor biology. For instance, dynamic contrast-enhanced (DCE)-MRI indirectly visualizes angiogenesis [12], and is typically used for local tumor staging. MR diffusion-weighted imaging (MR-DWI) visualizes the ability of water molecules to move freely inside tumors, providing a measure of how chaotic cells have been laid out. It has been investigated for several applications [13,14], including cancer differentiation, although results were not consistent [15–18]. Thirdly, magnetic resonance spectroscopy (MRS) visualizes the metabolism of cancers. In particular, 31-Phosphorus MR spectroscopy ( $^{31}P$ -MRS) measures the phosphorus components in tumors, which play an important role in the forming of new cell membranes [19]. However, conventional MRI scanners lack the ability to do  $^{31}P$ -MRS, because phosphorus components are not highly abundant in the human body. Recent MRI scanners with high magnetic field strength at 7 tesla (T) have been able to detect these components in breast cancers.

In order to increase the confidence of preoperative indication for systemic therapy to the same level as that obtained from the surgically excised tissue, we hypothesized that combining several MRI modalities (i.e., multiparametric imaging) prior to surgery provides complementary information. The objective of this study is to use multiparametric breast MRI at high field

strength to preoperatively discriminate between patients with early-stage breast cancer indicated for systemic therapy and patients who are not indicated.

## Materials and methods

Patients were included from the PROFILE (*Patient Risk based On Functional MRI*) study. All women in this study had histologically proven invasive breast cancer eligible for breast conserving therapy based on conventional imaging. Exclusion criteria were prior surgery, prior radiotherapy of the ipsilateral breast, neoadjuvant chemotherapy, and typical contraindications for MRI. Patients were consecutively recruited from the University Medical Center Utrecht and the Albert Schweitzer hospital in Dordrecht. Approval for this study was obtained from the institutional review board of the University Medical Center Utrecht and written informed consent was obtained from all patients. A total of 46 patients are described in this study, of which 14 patients were reported earlier in an explorative study considering the potential of multiparametric 7-tesla breast MRI to characterize breast cancer [18].

## Conventional diagnostic workup

Preoperatively, tumor size was assessed by the largest tumor diameter on ultrasound or mammographic imaging. Ultrasound-guided 14-Gauge tumor biopsies of the invasive lesions were acquired, and histopathology was obtained. Biopsy-derived tumor tissue was stained using hematoxyline and eosine (H&E). Tumor grade was assessed according to the modified Bloom and Richardson guidelines[20]. Mitotic count was assessed as the number of mitotic figures per 2 mm<sup>2</sup>. Tumor type and estrogen receptor (ER) status were assessed on H&E slides. For ER, a 10% staining threshold was used to differentiate between a positive ( $\geq 10\%$ ) and a negative ( $< 10\%$ ) status. Preoperative lymph node status was assessed using ultrasound-guided fine-needle aspiration of suspected lymph nodes (cortex-thickness  $> 2.3$  mm).

Postoperatively, the resection specimen was treated according to a protocol adapted from Egan et al. [21] as described earlier [18]. In short, the resection specimen was cut in approximately 4 mm thick slices and fixed in formalin overnight. The slice containing the largest tumor diameter was chosen as representative for tumor characterization. Tumor size was assessed macro and microscopically. Tumor grade, mitotic count, tumor type, and receptor status was examined using procedures comparable with the assessment of the biopsy-derived tissue. A positive lymph node was defined as a lymph node containing macro or microscopic disease on sentinel node biopsy and/or axillary lymph node dissection when available.

## Indication for systemic therapy

The risk of 10-year mortality and 10-year relapse were estimated using the web-based tool Adjuvant Online (AOL) (version 8.0), which is based on the SEER database and validated in multiple countries[22–24]. The AOL estimates were obtained twice for each patient, once using preoperative information only and once using postoperative information. Hence, patient age at diagnosis, and characteristics from the primary tumor were entered from preoperative or postoperative assessment: ER-status, tumor grade, tumor size, and number of positive lymph nodes. Co-morbidity was set to default: ‘minor problems’. Missing data was set to ‘undefined’. The indication for systemic therapy was based on the Dutch national guidelines ([www.oncoline.nl](http://www.oncoline.nl)). In accordance with these guidelines an indication for systemic therapy was given when either the predicted risk of 10-year mortality was equal or higher than 15%, or when the predicted risk of 10-year relapse was equal or higher than 25%.

## MRI characteristics

Both DWI and DCE-MRI were performed in prone patient orientation using either a bilateral two-channel transmit/receive breast coil (i.e., setup 1) [25] or a bilateral two-channel transmit and 26-channel receive breast coil (i.e., setup 2) (MR Coils BV, Drunen, the Netherlands) [26]. All imaging was performed on a 7T whole body MR System (Philips Healthcare, Cleveland, Ohio, USA).

**DWI.** For DWI, a Multi slice Spin Echo-EPI was obtained: TE 49 ms, FOV 350 x 160 x 50 mm<sup>3</sup>; acquired resolution 2.0 x 2.0 x 3.0 mm<sup>3</sup>; b-values: 0, 100, 200, 500, 1000 s/mm<sup>2</sup>; scan duration 140–170s. A SENSE acceleration of 3 was performed for setup 2. Fat suppression was obtained using fat-selective adiabatic inversion recovery with an inversion delay of 320ms. Apparent diffusion coefficient (ADC) maps were calculated using all acquired b-values. On ADC maps, tumors were only scored when proper anatomic visualization of tumors and/or surrounding parenchyma was confirmed. ADC was manually drawn at the hypo-intense area of tumors using a region of interest (ROI) of 16–25 mm<sup>2</sup>. Artifacts and areas of necrosis were avoided.

**DCE-MRI.** DCE-MR imaging consisted of six fat-suppressed series, one prior to the injection of 0.1 mmol/kg gadolinium-containing contrast agent (Gadobutrol, Bayer Schering Pharma AG, Berlin, Germany), and five series following injection. The protocol consisted of 3D T1-weighted gradient echo sequences for setup 1 (TR/TE 4.3/2.1ms, flip angle 15°, field-of-view (FOV) 350 x 160 x 160 mm<sup>3</sup>, acquired resolution 1.0 x 1.0 x 1.0 mm<sup>3</sup>, scan duration 108s) and for setup 2 (TR/TE 5.8/2.5ms, flip angle 15°, FOV 350 x 160 x 160 mm<sup>3</sup>, acquired resolution 0.7 x 0.7 x 0.7 mm<sup>3</sup>, scan duration 91s, SENSE acceleration 4 x 2). A radiologist experienced with breast MRI considered all tumors separately using a scoring form based on the standardized American College of Radiology Breast Imaging Reporting and Data System (ACR BI-RADS)-MRI lexicon [27]. Tumor size was assessed as the largest tumor extent over three orthogonal directions. For the multivariate model, missing value was denoted as the mean value.

**<sup>31</sup>P-MRS.** <sup>31</sup>P-MRS was acquired with a double-tuned unilateral quadrature RF coil using the AMESING [28] sequence (3D <sup>31</sup>P multi-echo MRSI sequence using spherical k-space sampling; TR/dTE: 6000/45ms, adiabatic flip angle 90°, FOV 160 x 160 x 160 mm, nominal spatial resolution 20 x 20 x 20 mm<sup>3</sup>, scan duration 1536s). One free induction decay (FID) and 5 full echoes were acquired within one TR, resulting in an FID at 0ms and echoes at 45, 90, 135, 180 and 225ms respectively. On <sup>31</sup>P-MR spectra, the phosphocreatine signal of the pectoral muscle was acquired to confirm proper functioning of the coil, and spectra were only analyzed when clearly visible. The <sup>31</sup>P-MR spectra were assessed of the voxel containing the tumor. Two experienced observers (W.K. and D.K.) scored the spectra individually according to a lexicon which was designed previously and in consensus [18]. This lexicon categorizes proliferative activity of tumors on dominance of either phosphomonoester (PME) phosphodiester (PDE) or peaks into three groups (PME < PDE; PME = PDE; PME > PDE). Observers were blinded for patient information and tumor characteristics from histopathology. The spectra of 29 tumors, which are described here for the first time, were scored separately to assess the inter-observer variability. Finally, consensus was obtained between the two readers. For the multivariate model, missing spectra were denoted as the median score (PME = PDE).

## Statistical analysis

Analyses were performed using SPSS software (version 23.0 for Windows; SPSS; Chicago, Ill). The agreement between preoperative and postoperative tumor characteristics (ER-status, tumor grade, tumor size, and lymph node status) was established using two-sided Pearson's

chi-squared and Fisher’s exact tests. For <sup>31</sup>P-MRS, agreement in terms of inter-observer variability was established from the scores obtained by the two observers using the Kappa statistic. Associations of ADC and <sup>31</sup>P-MRS score with the postoperative tumor characteristics (ER-status, tumor grade, tumor size, lymph node status, and mitotic count) was assessed using two-sided Pearson’s chi-squared, Fisher’s exact, and Kruskal Wallis tests. The agreement between preoperative and postoperative indication for systemic therapy was expressed using the Kappa statistic. Whether an association existed between the postoperative indication for systemic therapy and tumor size on DCE-MRI, ADC on DWI, or <sup>31</sup>P-MRS scoring was assessed using two-sided Pearson’s chi-squared and Mann-Whitney U tests.

For the decision model, a multivariate decision tree was built based on the CHAID growing method to estimate the postoperative indication for systemic therapy using preoperatively available characteristics. The (positive/negative) postoperative indication for systemic therapy was taken as the dependent variable. Independent variables included the preoperative indication for systemic therapy (as a forced first variable) and the imaging characteristics with association ( $p \leq 0,05$ ) to the postoperative indication for systemic therapy. Conventional diagnostics were prioritized where possible. Backward covariate selection ( $p$ -to-remove = 0.05) was deployed.

## Results

### Conventional diagnostic workup

Forty-six patients were included—mean age 60 years (range 43–74 years)—with 48 histologically proven invasive carcinomas in total. In two patients a second ipsilateral tumor was detected.

Postoperatively, 45 lesions had a positive ER-status, and 3 lesions had a negative ER-status. Tumors were stratified into grade 1 (N = 14), grade 2 (N = 30) and grade 3 (N = 4). The mean size of the 48 invasive lesions was 14 mm (range: 3–36 mm). For 16 tumors lymph node metastases were found in either one (N = 11), two (N = 3), or three (N = 2) nodes. For 32 tumors, no positive lymph nodes were found. The mean mitotic count was 5 per 2 mm<sup>2</sup> (range: 0–38).

The association between preoperative and postoperative tumor characteristics is shown in Table 1. For ER-status high agreement was seen in 47/48 (98%) tumors (Kappa = 0.846). Less

**Table 1. Association between the preoperative and postoperative tumor characteristics on conventional diagnostic workup.** ER = Estrogen receptor.

| Preoperative             | Postoperative            |                          |                          |                          | p-value       |
|--------------------------|--------------------------|--------------------------|--------------------------|--------------------------|---------------|
| <b>ER-status</b>         | <i>Positive</i>          | <i>Negative</i>          |                          |                          |               |
| <i>Positive (n; %)</i>   | <b>44 (100%)</b>         | 0 (0%)                   |                          |                          | P<0.001       |
| <i>Negative (n; %)</i>   | 1 (25%)                  | <b>3 (75%)</b>           |                          |                          | Kappa = 0.846 |
| <b>Tumor grade</b>       | <i>Grade 1</i>           | <i>Grade 2</i>           | <i>Grade 3</i>           |                          |               |
| <i>Grade 1 (n; %)</i>    | <b>12 (71%)</b>          | 5 (29%)                  | 0 (0%)                   |                          | P<0.001       |
| <i>Grade 2 (n; %)</i>    | 2 (7%)                   | <b>23 (88%)</b>          | 4 (15%)                  |                          | Kappa = 0.475 |
| <i>Grade 3 (n; %)</i>    | 0 (0%)                   | 2 (100%)                 | <b>0 (0%)</b>            |                          |               |
| <b>Tumor size</b>        | <i>0.1–1.0 cm (n; %)</i> | <i>1.1–2.0 cm (n; %)</i> | <i>2.1–3.0 cm (n; %)</i> | <i>3.1–5.0 cm (n; %)</i> |               |
| <i>0.1–1.0 cm (n; %)</i> | <b>14 (78%)</b>          | 4 (22%)                  | 0 (0%)                   | 0 (0%)                   | P<0.001       |
| <i>1.1–2.0 cm (n; %)</i> | 2 (8%)                   | <b>19 (79%)</b>          | 2 (8%)                   | 1 (4%)                   | Kappa = 0.604 |
| <i>2.1–3.0 cm (n; %)</i> | 0 (0%)                   | 1 (17%)                  | <b>4 (67%)</b>           | 1 (17%)                  |               |
| <b>Lymph node status</b> | <i>Positive</i>          | <i>Negative</i>          |                          |                          |               |
| <i>Positive (n; %)</i>   | <b>2 (100%)</b>          | 0 (0%)                   |                          |                          | p = 0.106     |
| <i>Negative (n; %)</i>   | 14 (30%)                 | <b>32 (70%)</b>          |                          |                          | Kappa = 0.160 |

<https://doi.org/10.1371/journal.pone.0183855.t001>

agreement was observed for tumor grade, in 35/48 (73%) tumors (Kappa = 0.627), and tumor size, in 37/48 (77%) tumors (Kappa = 0.604). For lymph node status the lowest agreement was observed in 34/48 (71%) tumors (Kappa = 0.106). Although a positive preoperative lymph node status was highly suggestive for a positive postoperative status, a negative status is only correct in 70% of tumors.

### MRI characteristics

On DCE-MRI, a mean tumor size of 18 mm (range: 8–51 mm) was seen. Tumor extent could not be clearly assessed in one patient. On DWI, the ADC was successfully assessed in 40 tumors. In six tumors no proper anatomic visualization of tumor and/or surrounding parenchyma was seen: one tumor was outside the chosen field-of-view, and one tumor was not imaged due to a technical problem. The mean ADC of the tumors was  $773 \times 10^{-6} \text{mm}^2/\text{s}$  (range:  $539\text{--}1013 \times 10^{-6} \text{mm}^2/\text{s}$ ). The  $^{31}\text{P}$ -MRS was assessed in 40 tumors. One patient stopped prior to the start of the  $^{31}\text{P}$ -MRS sequence, in four patients  $^{31}\text{P}$ -MRS was not performed due to technical difficulties, and in three patients no signal from the pectoral muscle was seen on  $^{31}\text{P}$ -MR spectra. Inter-observer agreement for scoring  $^{31}\text{P}$ -MRS was found for 24/29 tumors (83%; kappa: 0.716) (Table 2). Observer 2 underscored five tumors as compared with observer 1. In consensus,  $^{31}\text{P}$ -MRS scoring of observer 1 was maintained. Overall, this led to a stratification of 10 tumors in the  $\text{PME} < \text{PDE}$  group, 13 tumors in the  $\text{PME} = \text{PDE}$  group, and 17 tumors in the  $\text{PME} > \text{PDE}$  group.

The association of ADC and  $^{31}\text{P}$ -MRS score with the postoperative tumor characteristics at pathology are shown in Table 3. In short, a significantly ( $p = 0.041$ ) lower mean ADC was found in ER-positive tumors compared with ER-negative tumors, although the vast majority of tumors were ER-positive. In conformity with results from the prior explorative study, an inverse trend was again seen between ADC and tumor grade ( $p = 0.085$ ), and for  $^{31}\text{P}$ -MRS a significant association was observed with mitotic count ( $p = 0.014$ ).

For lymph node status, both DWI and  $^{31}\text{P}$ -MRS showed association with the postoperative tumor characteristics. ADC yielded a trend ( $p = 0.081$ ), with lower mean ADC in tumors with positive lymph node status.  $^{31}\text{P}$ -MRS showed a significant correlation with lymph node status ( $p = 0.044$ ): the majority of tumors with a positive lymph node status had  $\text{PME} > \text{PDE}$  score.

### Indication for systemic therapy

Postoperatively, 20/46 patients (43%) had positive indication for systemic therapy, and 26/46 patients (57%) negative indication (Table 4). Preoperatively, a positive indication for systemic therapy was in agreement with the postoperative indication in 8/8 patients (100%). A negative preoperative indication agreed with the postoperative indication in 26/38 patients (68%).

### Indication for systemic therapy and MRI characteristics

Significant association ( $p = 0.002$ ) was found between the postoperative indication for systemic therapy and tumor size on DCE-MRI (Table 5). Smaller tumors ( $\leq 2$  cm) were more often

**Table 2. Inter-observer variability between observer 1 (W.K.) and observer 2 (D.K.) for 31-phosphorus spectroscopy ( $^{31}\text{P}$ -MRS) scoring.** Agreement is seen in 24/29 tumors (83%; kappa: 0.716). PME = Phosphomonoesters. PDE = Phosphodiesteres.

| $^{31}\text{P}$ -MRS score observer 1 |           | $^{31}\text{P}$ -MRS score observer 2 |           |           | Kappa: 0.716 |
|---------------------------------------|-----------|---------------------------------------|-----------|-----------|--------------|
|                                       |           | PME < PDE                             | PME = PDE | PME > PDE |              |
|                                       | PME < PDE | 3                                     | 0         | 0         |              |
|                                       | PME = PDE | 0                                     | 12        | 0         |              |
|                                       | PME > PDE | 1                                     | 4         | 9         |              |

<https://doi.org/10.1371/journal.pone.0183855.t002>

**Table 3. Association between postoperative histopathology and 7T MRI characteristics.** A significant association ( $p < 0.05^*$ ) was seen between the mean apparent diffusion coefficient (ADC) on diffusion weighted imaging and estrogen receptor (ER)-status, and also between the 31-phosphorus magnetic resonance spectroscopy ( $^{31}\text{P}$ -MRS)-scoring and lymph node status as well as mitotic count. A trend ( $p < 0.10^{**}$ ) was seen between mean ADC and tumor grade as well as lymph node status. PME = Phosphomonoesters. PDE = Phosphodiesteres.

| Postoperative tumor characteristics |           |        | ADC mean                                  | p-value       | Total  | $^{31}\text{P}$ -MRS |           |           | p-value |
|-------------------------------------|-----------|--------|-------------------------------------------|---------------|--------|----------------------|-----------|-----------|---------|
|                                     |           |        | $\times 10^{-6}\text{mm}^2/\text{s}$ (sd) |               |        | PME<PDE              | PME = PDE | PME>PDE   |         |
| ER-status                           | Positive  | N = 37 | 762 (sd: 114)                             | 0.041*        | N = 37 | 9                    | 12        | 16        | 0.925   |
|                                     | Negative  | N = 3  | 911 (sd: 84)                              |               | N = 3  | 1                    | 1         | 1         |         |
| Tumor grade                         | Grade 1   | N = 10 | 809 (sd:109)                              | 0.085**       | N = 12 | 4                    | 5         | 3         | 0.401   |
|                                     | Grade 2   | N = 27 | 774 (sd:120)                              |               | N = 24 | 5                    | 8         | 11        |         |
|                                     | Grade 3   | N = 3  | 647 (sd:32)                               |               | N = 4  | 1                    | 0         | 3         |         |
| Tumor size                          | 0.1–1.0   | N = 12 | 761 (sd:128)                              | 0.325         | N = 15 | 6                    | 5         | 4         | 0.230   |
|                                     | 1.1–2.0   | N = 21 | 798 (sd:119)                              |               | N = 19 | 3                    | 8         | 8         |         |
|                                     | 2.1–3.0   | N = 5  | 724 (sd:87)                               |               | N = 5  | 1                    | 0         | 4         |         |
|                                     | 3.1–5.0   | N = 2  | 715 (sd:130)                              |               | N = 1  | 0                    | 0         | 1         |         |
| Lymph node status                   | Negative  | N = 25 | 798 (sd: 116)                             | 0.081**       | N = 25 | 7                    | 11        | 7         | 0.044*  |
|                                     | Positive  | N = 15 | 732 (sd: 114)                             |               | N = 15 | 3                    | 2         | 10        |         |
| Mitotic count                       | mean (sd) | N = 40 |                                           | $R^2 = 0.077$ | N = 40 | 4.5 (5.9)            | 3.4 (3.3) | 8.5 (8.4) | 0.014*  |

<https://doi.org/10.1371/journal.pone.0183855.t003>

**Table 4. Association between the preoperative and postoperative indication for systemic therapy based on conventional diagnostic workup.**

| Indication systemic therapy | Postoperative   |                 |         | p-value       |
|-----------------------------|-----------------|-----------------|---------|---------------|
| Preoperative                | Positive        | Negative        | Missing |               |
| Positive (n; %)             | <b>8 (100%)</b> | 0 (0%)          | 0       | $p < 0.001$   |
| Negative (n; %)             | 12 (32%)        | <b>26 (68%)</b> | 1       | Kappa = 0.430 |

<https://doi.org/10.1371/journal.pone.0183855.t004>

**Table 5. Univariate association of 7 tesla magnetic resonance imaging (7T MRI) characteristics and postoperative indication for systemic therapy.**

A significant ( $p < 0.05^*$ ) association is seen between the postoperative indication for systemic therapy and dynamic contrast-enhanced (DCE)-MRI as well as 31-phosphorus magnetic resonance spectroscopy ( $^{31}\text{P}$ -MRS). No association was seen between the postoperative indication and the apparent diffusion coefficient (ADC) on diffusion-weighted imaging (DWI).

| 7T MRI characteristics                                   | Postoperative indication systemic therapy |                       | p-value         |               |
|----------------------------------------------------------|-------------------------------------------|-----------------------|-----------------|---------------|
|                                                          | No                                        | Yes                   |                 |               |
| DCE-MRI tumor size (cm)                                  | 0.1–1.0 (n; %)                            | <b>6 (100%)</b>       | 0 (0%)          | $p = 0.002^*$ |
|                                                          | 1.1–2.0 (n; %)                            | <b>17 (65%)</b>       | 9 (35%)         |               |
|                                                          | 2.1–3.0 (n; %)                            | 2 (20%)               | <b>8 (80%)</b>  |               |
|                                                          | 3.1–5.0 (n; %)                            | 0 (0%)                | <b>3 (100%)</b> |               |
|                                                          | missing (n)                               | 1                     | <b>0</b>        |               |
| DWI (mean ADC $\times 10^{-6}\text{mm}^2/\text{s}$ ; sd) | 803 (N = 19; sd:124)                      | 750 (N = 19; sd: 113) | $p = 0.138$     |               |
|                                                          | missing (n)                               | 7                     | 1               |               |
| 31P-MRS (score)                                          | PME<PDE (n; %)                            | <b>7 (70%)</b>        | 3 (30%)         | $p = 0.014^*$ |
|                                                          | PME = PDE (n; %)                          | <b>9 (75%)</b>        | 3 (25%)         |               |
|                                                          | PME>PDE (n; %)                            | 4 (25%)               | <b>12 (75%)</b> |               |
|                                                          | missing (n)                               | 6                     | 2               |               |

<https://doi.org/10.1371/journal.pone.0183855.t005>

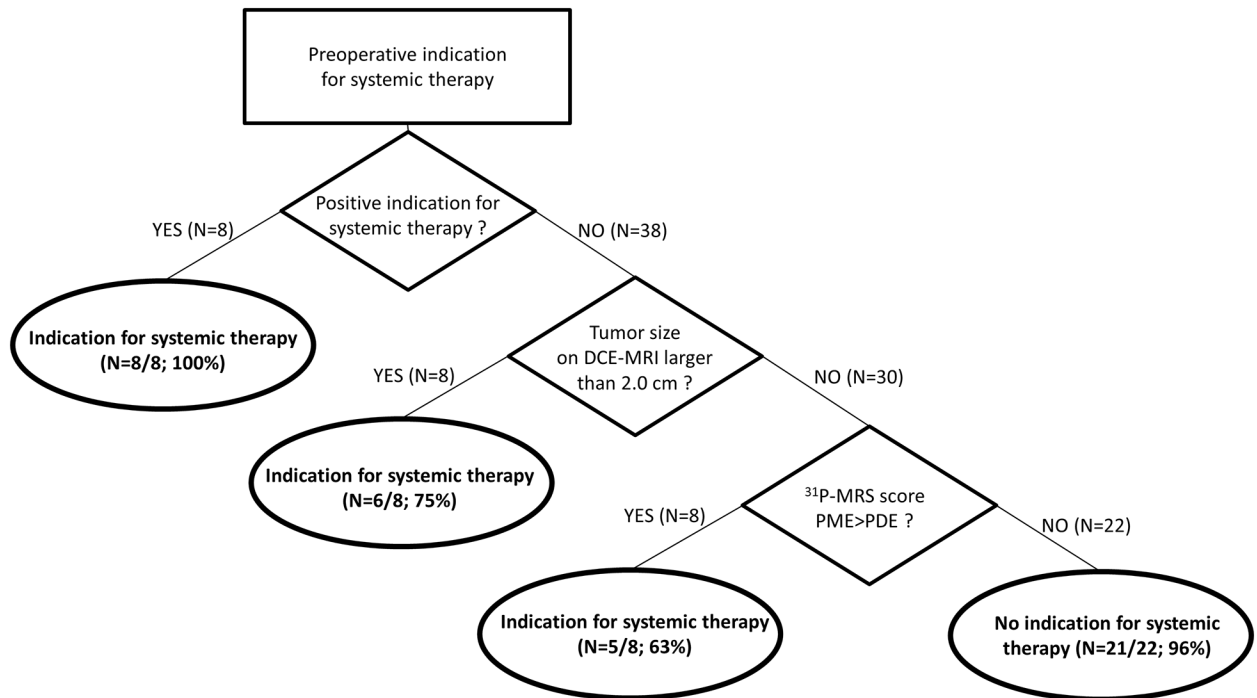

**Fig 1. A decision tree was created to establish a preoperative indication for systemic therapy, taking the postoperative indication as the golden standard.** 7T DCE-MRI = 7 tesla dynamic contrast-enhanced magnetic resonance imaging. <sup>31</sup>P-MRS = <sup>31</sup>P-Phosphorus MR spectroscopy. PME = Phosphomonoesters. PDE = Phosphodiesteres.

<https://doi.org/10.1371/journal.pone.0183855.g001>

associated with a negative indication for systemic therapy, whereas larger tumors (>2 cm) were more often associated with a positive indication. In addition, a significant association ( $p = 0.030$ ) was observed between the postoperative indication and the <sup>31</sup>P-MRS score. Tumors with a <sup>31</sup>P-MRS score  $PME \leq PDE$  were more often associated with a negative indication, and tumors with  $PME > PDE$  more often with a positive indication.

### Preoperative decision model

The decision model to preoperatively assess the indication for systemic therapy is shown in Fig 1. A positive preoperative indication for systemic therapy showed high agreement with a positive postoperative indication ( $N = 8/8$ ; 100%).

A negative preoperative indication ( $N = 38$ ) was, however, less accurate. For patients with a negative preoperative indication, only 26/38 patients (68%) had a negative postoperative indication. However, in this group, exclusion of patients with a tumor larger than 2.0cm on DCE-MRI, raised the accuracy for a correct negative indication to 24/30 patients (80%). With the addition of <sup>31</sup>P-MRS scoring, exclusion of patients with a tumor scoring  $PME > PDE$  on <sup>31</sup>P-MRS, raised the accuracy for a correct negative indication to 21/22 patients (96%). Examples are shown in Fig 2.

### Discussion

Positive preoperative indication for systemic therapy based on biopsied tissue and conventional breast imaging showed high agreement with a positive postoperative indication from resected tissue (the gold standard). A negative preoperative indication was only accurate in tumors not larger than 2.0 cm on DCE-MRI or with a  $PME > PDE$  score at <sup>31</sup>P-MRS. Thus, in



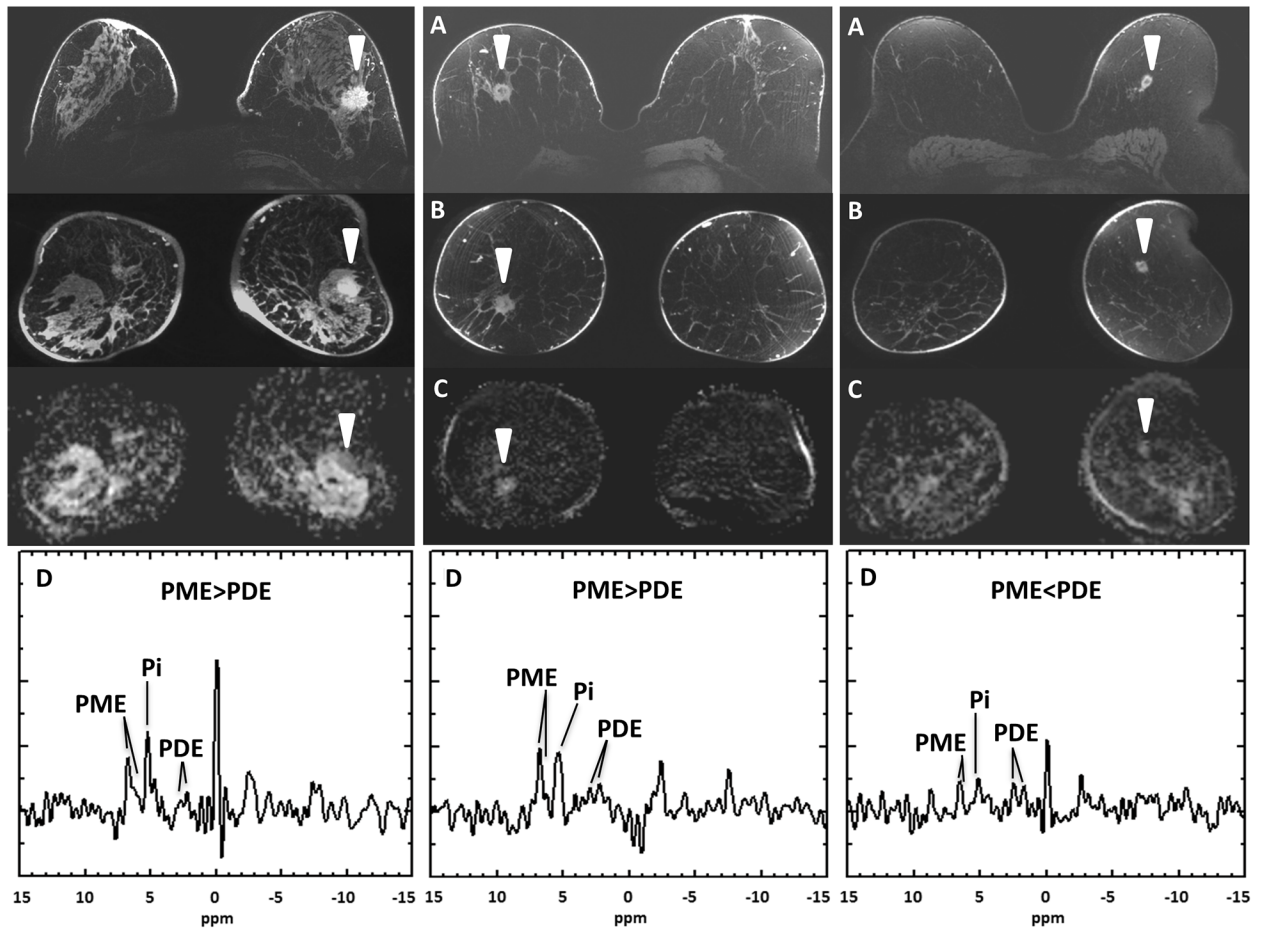

**Fig 2. Examples of 7 tesla MR imaging in three patients, showing the first post-contrast dynamic contrast-enhanced MR imaging in the (A) transverse plane and the (B) coronal plane, with (C) the corresponding apparent diffusion coefficient (ADC) map; and (D) the corresponding 31-phosphorus MR spectroscopy ( $^{31}\text{P}$ -MRS) scoring upon the ratio of phosphomonoesters (PME) to phosphodiester (PDE).** All three patients (left/middle/right) had a negative preoperative indication for systemic therapy based on biopsy and conventional breast imaging. On the left, imaging is shown of a 47-year old woman. The decision-tree model upstages this assessment to positive indication: DCE-MRI showed a 23-mm sized lesion, an ADC of  $746 \times 10^{-6} \text{mm}^2/\text{s}$ , and a PME>PDE score. Postoperatively, a grade 2 tumor and a positive indication for systemic therapy was established. In the middle, imaging is shown of a 58-year old woman. The decision-tree model again upstages this assessment to positive indication: DCE-MRI showed an 18-mm sized lesion, an ADC of  $980 \times 10^{-6} \text{mm}^2/\text{s}$ . The MRS score was, however, PME>PDE. Postoperatively, a grade 2 tumor and a positive indication for systemic therapy was established. On the right, imaging is shown of a 71-year old woman. The decision-tree model confirms the negative indication: DCE-MRI showed a 16-mm sized lesion, DWI a mean ADC of  $834 \times 10^{-6} \text{mm}^2/\text{s}$ , and  $^{31}\text{P}$ -MRS a PME<PDE score. Postoperatively, a grade 2 tumor and a negative indication for systemic therapy was established. Pi = Inorganic phosphate.

<https://doi.org/10.1371/journal.pone.0183855.g002>

a subgroup of patients with early-stage breast cancer, preoperative multiparametric breast MRI at 7T enables an accurate risk assessment of breast cancer comparable to conventional assessment from surgically resected tissue.

These findings may ultimately have practice-changing impact on the treatment of patients with early-stage breast cancer, who are currently susceptible to overtreatment [29]. Continuous effort is made towards more individualized and less invasive therapy in this group of patients, but current guidelines for systemic therapy still require a representative resection specimen. Early-stage breast cancer patients in whom the positive indication for systemic therapy is known with high accuracy prior to surgery could be treated with systemic therapy prior to the surgical intervention, thus achieving similar long-term benefit as postoperative systemic

therapy, but with the added benefit of allowing response of the tumor and axilla to be monitored [30]. This opens new treatment paradigms where patients with excellent response may be spared axillary surgery and minimize the extent of breast surgery, which will reduce side effects and improve the quality of life after treatment [31,32]. Another possible scenario is to substitute surgery on a completely responding tumor with accelerated partial breast irradiation directed at the former tumor bed [33]. For early-stage breast cancer patients with a negative preoperative indication for systemic therapy, multiparametric 7T breast MRI could be added to the clinical workflow. Within this subgroup, patients with tumors of 2.0 cm or smaller on DCE-MRI and  $PME \leq PDE$  score on  $^{31}P$ -MRS may be suited for less invasive treatment, and the addition of a 7T MRI scan in this subgroup may give new impulse to ongoing studies on less- and non-invasive techniques for primary breast cancer treatment, such as MR-guided high-intensity focused ultrasound [7,8].

Guidelines for preoperative (i.e., neoadjuvant) chemotherapy are currently focused on patients for whom little doubt exists that they will be indicated for chemotherapy after inspection of the resection specimen. Consequently, new techniques to extend the indication for preoperative chemotherapy towards early breast cancer must ensure that patients who would be selected postoperatively will also be selected preoperatively. The current study demonstrates the potential to identify three groups of patients preoperatively: those with high confidence that systemic therapy is indicated, those with high confidence that it is not, and a third group where the assessment is uncertain.

The indication for systemic therapy was estimated from 10-year risk estimates of mortality and relapse derived from AOL and considering patient age, ER-status, tumor grade, tumor size, and the number of positive lymph nodes. In the decision model, a subgroup of early breast cancer patients is selected with a negative indication based on tumor size at DCE-MRI and  $^{31}P$ -MRS score. Although tumor size on DCE-MRI may be anticipated as an imaging biomarker for patient prognosis, the complementary role of  $^{31}P$ -MRS as a biomarker for patient prognosis has been demonstrated for the first time. The results may be explained by the correlation between  $^{31}P$ -MRS and mitotic count, where higher levels of PME in the  $^{31}P$ -MRS phosphorus metabolism are associated with higher mitotic count. This confirms the finding in a recent explorative study with  $^{31}P$ -MRS on 7T MRI [18]. In addition,  $^{31}P$ -MRS on 7T MRI was found to be significantly associated with lymph node status in the current study.

Without taking preoperative multiparametric imaging into account, the findings of the current study are in agreement with a previous study performed on an independent database of patients from a different hospital [11]. In that study, a positive preoperative indication showed high agreement with a positive postoperative indication in 94% of patients, and negative indication showed only 67% agreement. In this latter group of patients, additional stratification using preoperative sentinel lymph node biopsy was considered a potential clinical step, which led to an anticipated agreement of approximately 89%. In the current study, however, the addition of tumor size on DCE-MRI and  $^{31}P$ -MRS scoring resulted in an agreement of 96%. These results suggest that information from multiparametric imaging has potential to complement the missing lymph node status. Moreover, when considering minimally invasive treatment, a proposed stratification that requires additional imaging would be favored over an additional invasive surgical procedure.

Other techniques are currently available to assess the risk of metastases (i.e., indication for systemic therapy), for example molecular assays such as the MammaPrint [34] or Oncotype-DX [35]. These techniques are increasingly used, and found to be useful prognostic indicators. Nonetheless, molecular essays are typically established from the postoperative resection specimen as well. Although it is currently possible to obtain a MammaPrint and Oncotype-DX assessment from biopsied tissue, it is as yet unclear to what extent the results are affected by

the heterogeneity of the tumor. Moreover, the test may take two weeks to complete which could result in delay of surgery when applied in the context such as described in the current study. Conversely, molecular assays are based on different risk models than the one used in current study, and may result in superior risk assessments if a resection specimen is available. An advantage of multiparametric MRI is, however, that results become available directly after imaging, that it provides information across the entire tumor, and that it is relatively inexpensive compared with molecular tests.

Although tumor size on DCE-MRI can be visualized with conventional 1.5T and 3.0T MRI scanners, imaging,  $^{31}\text{P}$ -MRS is still limited to 7T MRI. Although not widely available at the moment, 7T MRI could be used as a specialized in-vivo biology-imaging device in a select patient group with early breast cancer to broaden the indication for upfront therapy. DCE-MRI is typically used to define tumor extent, most importantly assessment of tumor size. In this study, DCE-MRI was used in accordance with the regular clinical setting. Prior studies have suggested more advanced imaging analyses to provide relationships between DCE-MRI characteristics and prognostic markers of breast cancer [36]. Whether 7 Tesla Breast MRI has a potential role in this subject will be focus of future study. Also, in future study breast cancer subtype should be taken into consideration as they have an important role in guiding treatment decisions. Unfortunately this was currently not possible due to limited patient numbers.

This study has some limitations. Although substantial agreement was found between observers to interpret  $^{31}\text{P}$ -MRS, thus making it a reproducible tool, continuous efforts must be made to obtain quantitative assessment of  $^{31}\text{P}$ -MRS. Also, technical issues in performing  $^{31}\text{P}$ -MRS occurred in seven patients in this study. For DWI, missing values were seen in six tumors caused by a non-proper visualization of tumors or the surrounding parenchyma. DWI was possibly not included in the decision tree because of these issues, and hence DWI cannot yet be excluded as a prognostic indicator. Ongoing technical research in MR coil design, MR pulse sequence design, and MR image analysis may provide solutions to overcome these limitations.

## Conclusions

Preoperatively, a positive indication for systemic therapy is highly accurate for patients with early-stage breast cancer when compared to the postoperative (golden standard) indication. A negative preoperative indication is also highly accurate (96%), but only when exempting tumors larger than 2.0 cm on DCE-MRI or with  $\text{PME} > \text{PDE}$  ratios at  $^{31}\text{P}$ -MRS.

## Acknowledgments

The study was conducted with financial support of The Dutch Pink Ribbon Foundation (<http://www.pinkribbon.nl>), grant number 9684.2011.WO36.

## Author Contributions

**Conceptualization:** A. M. T. Schmitz, W. B. Veldhuis, M. B. E. Menke-Pluijmers, W. J. M. van der Kemp, T. A. van der Velden, M. C. J. M. Kock, P. J. Westenend, D. W. J. Klomp, K. G. A. Gilhuijs.

**Data curation:** A. M. T. Schmitz, W. B. Veldhuis, M. B. E. Menke-Pluijmers, W. J. M. van der Kemp, T. A. van der Velden, M. C. J. M. Kock, P. J. Westenend, D. W. J. Klomp, K. G. A. Gilhuijs.

**Formal analysis:** A. M. T. Schmitz.

**Funding acquisition:** M. A. Viergever, W. P. T. M. Mali, K. G. A. Gilhuijs.

**Investigation:** A. M. T. Schmitz, W. B. Veldhuis, M. B. E. Menke-Pluijmers, W. J. M. van der Kemp, T. A. van der Velden, M. C. J. M. Kock, P. J. Westenend, D. W. J. Klomp, K. G. A. Gilhuijs.

**Methodology:** A. M. T. Schmitz, W. B. Veldhuis, M. B. E. Menke-Pluijmers, W. J. M. van der Kemp, T. A. van der Velden, M. A. Viergever, W. P. T. M. Mali, M. C. J. M. Kock, P. J. Westenend, D. W. J. Klomp, K. G. A. Gilhuijs.

**Project administration:** A. M. T. Schmitz.

**Writing – original draft:** A. M. T. Schmitz, K. G. A. Gilhuijs.

**Writing – review & editing:** A. M. T. Schmitz, W. B. Veldhuis, M. B. E. Menke-Pluijmers, W. J. M. van der Kemp, T. A. van der Velden, M. A. Viergever, W. P. T. M. Mali, M. C. J. M. Kock, P. J. Westenend, D. W. J. Klomp, K. G. A. Gilhuijs.

## References

1. Veronesi U, Salvadori B, Luini A, Greco M, Saccozzi R, del VM, et al. Breast conservation is a safe method in patients with small cancer of the breast. Long-term results of three randomised trials on 1,973 patients. *Eur J Cancer* 1995 Sep; 31A(10):1574–9. PMID: [7488404](https://pubmed.ncbi.nlm.nih.gov/7488404/)
2. Fisher B, Anderson S, Bryant J, Margolese RG, Deutsch M, Fisher ER, et al. Twenty-year follow-up of a randomized trial comparing total mastectomy, lumpectomy, and lumpectomy plus irradiation for the treatment of invasive breast cancer. *N Engl J Med* 2002 Oct 17; 347(16):1233–41. <https://doi.org/10.1056/NEJMoa022152> PMID: [12393820](https://pubmed.ncbi.nlm.nih.gov/12393820/)
3. Palta M, Yoo S, Adamson JD, Prosnitz LR, Horton JK. Preoperative single fraction partial breast radiotherapy for early-stage breast cancer. *Int J Radiat Oncol Biol Phys* 2012 Jan 1; 82(1):37–42. <https://doi.org/10.1016/j.ijrobp.2010.09.041> PMID: [21093166](https://pubmed.ncbi.nlm.nih.gov/21093166/)
4. Fisher B, Brown A, Mamounas E, Wieand S, Robidoux A, Margolese RG, et al. Effect of preoperative chemotherapy on local-regional disease in women with operable breast cancer: findings from National Surgical Adjuvant Breast and Bowel Project B-18. *J Clin Oncol* 1997 Jul; 15(7):2483–93. <https://doi.org/10.1200/JCO.1997.15.7.2483> PMID: [9215816](https://pubmed.ncbi.nlm.nih.gov/9215816/)
5. van den Bosch M, Daniel B, Rieke V, Butts-Pauly K, Kermit E, Jeffrey S. MRI-guided radiofrequency ablation of breast cancer: preliminary clinical experience. *J Magn Reson Imaging* 2008 Jan; 27(1):204–8. <https://doi.org/10.1002/jmri.21190> PMID: [18050333](https://pubmed.ncbi.nlm.nih.gov/18050333/)
6. Sabel MS, Kaufman CS, Whitworth P, Chang H, Stocks LH, Simmons R, et al. Cryoablation of early-stage breast cancer: work-in-progress report of a multi-institutional trial. *Ann Surg Oncol* 2004 May; 11(5):542–9. <https://doi.org/10.1245/ASO.2004.08.003> PMID: [15123465](https://pubmed.ncbi.nlm.nih.gov/15123465/)
7. Schmitz AC, Gianfelice D, Daniel BL, Mali WP, van den Bosch MA. Image-guided focused ultrasound ablation of breast cancer: current status, challenges, and future directions. *Eur Radiol* 2008 Jul; 18(7):1431–41. <https://doi.org/10.1007/s00330-008-0906-0> PMID: [18351348](https://pubmed.ncbi.nlm.nih.gov/18351348/)
8. Wu F, Wang ZB, Cao YD, Chen WZ, Bai J, Zou JZ, et al. A randomised clinical trial of high-intensity focused ultrasound ablation for the treatment of patients with localised breast cancer. *Br J Cancer* 2003 Dec 15; 89(12):2227–33. <https://doi.org/10.1038/sj.bjc.6601411> PMID: [14676799](https://pubmed.ncbi.nlm.nih.gov/14676799/)
9. Harris GC, Denley HE, Pinder SE, Lee AH, Ellis IO, Elston CW, et al. Correlation of histologic prognostic factors in core biopsies and therapeutic excisions of invasive breast carcinoma. *Am J Surg Pathol* 2003 Jan; 27(1):11–5. PMID: [12502923](https://pubmed.ncbi.nlm.nih.gov/12502923/)
10. Badoual C, Maruani A, Ghorra C, Lebas P, Avigdor S, Michenet P. Pathological prognostic factors of invasive breast carcinoma in ultrasound-guided large core biopsies-correlation with subsequent surgical excisions. *Breast* 2005 Feb; 14(1):22–7. <https://doi.org/10.1016/j.breast.2004.07.005> PMID: [15695077](https://pubmed.ncbi.nlm.nih.gov/15695077/)
11. Schmitz AM, Oudejans JJ, Gilhuijs KG. Agreement on indication for systemic therapy between biopsied tissue and surgical excision specimens in breast cancer patients. *PLoS One* 2014; 9(3):e91439. <https://doi.org/10.1371/journal.pone.0091439> PMID: [24614128](https://pubmed.ncbi.nlm.nih.gov/24614128/)
12. Hylton N. Dynamic contrast-enhanced magnetic resonance imaging as an imaging biomarker. *J Clin Oncol* 2006 Jul 10; 24(20):3293–8. <https://doi.org/10.1200/JCO.2006.06.8080> PMID: [16829653](https://pubmed.ncbi.nlm.nih.gov/16829653/)

13. Guo Y, Cai YQ, Cai ZL, Gao YG, An NY, Ma L, et al. Differentiation of clinically benign and malignant breast lesions using diffusion-weighted imaging. *J Magn Reson Imaging* 2002 Aug; 16(2):172–8. <https://doi.org/10.1002/jmri.10140> PMID: 12203765
14. Sharma U, Danishad KK, Seenu V, Jagannathan NR. Longitudinal study of the assessment by MRI and diffusion-weighted imaging of tumor response in patients with locally advanced breast cancer undergoing neoadjuvant chemotherapy. *NMR Biomed* 2009 Jan; 22(1):104–13. <https://doi.org/10.1002/nbm.1245> PMID: 18384182
15. Razek AA, Gaballa G, Denewer A, Nada N. Invasive ductal carcinoma: correlation of apparent diffusion coefficient value with pathological prognostic factors. *NMR Biomed* 2010 Jul; 23(6):619–23. <https://doi.org/10.1002/nbm.1503> PMID: 20232453
16. Kim SH, Cha ES, Kim HS, Kang BJ, Choi JJ, Jung JH, et al. Diffusion-weighted imaging of breast cancer: correlation of the apparent diffusion coefficient value with prognostic factors. *J Magn Reson Imaging* 2009 Sep; 30(3):615–20. <https://doi.org/10.1002/jmri.21884> PMID: 19711411
17. Bickel H, Pinker-Domenig K, Bogner W, Spick C, Bago-Horvath Z, Weber M, et al. Quantitative apparent diffusion coefficient as a noninvasive imaging biomarker for the differentiation of invasive breast cancer and ductal carcinoma in situ. *Invest Radiol* 2015 Feb; 50(2):95–100. <https://doi.org/10.1097/RLI.000000000000104> PMID: 25333308
18. Schmitz AM, Veldhuis WB, Menke-Pluijmers MB, van der Kemp WJ, van der Velden TA, Kock MC, et al. Multiparametric MRI With Dynamic Contrast Enhancement, Diffusion-Weighted Imaging, and 31-Phosphorus Spectroscopy at 7 T for Characterization of Breast Cancer. *Invest Radiol* 2015 Jul 2.
19. Klomp DW, van de Bank BL, Raaijmakers A, Korteweg MA, Possanzini C, Boer VO, et al. 31P MRSI and 1H MRS at 7 T: initial results in human breast cancer. *NMR Biomed* 2011 Dec; 24(10):1337–42. <https://doi.org/10.1002/nbm.1696> PMID: 21433156
20. Rakha EA, El-Sayed ME, Lee AH, Elston CW, Grainge MJ, Hodi Z, et al. Prognostic significance of Nottingham histologic grade in invasive breast carcinoma. *J Clin Oncol* 2008 Jul 1; 26(19):3153–8. <https://doi.org/10.1200/JCO.2007.15.5986> PMID: 18490649
21. Egan RL. Multicentric breast carcinomas: clinical-radiographic-pathologic whole organ studies and 10-year survival. *Cancer* 1982 Mar 15; 49(6):1123–30. PMID: 6277457
22. Ravdin PM, Siminoff LA, Davis GJ, Mercer MB, Hewlett J, Gerson N, et al. Computer program to assist in making decisions about adjuvant therapy for women with early breast cancer. *J Clin Oncol* 2001 Feb 15; 19(4):980–91. <https://doi.org/10.1200/JCO.2001.19.4.980> PMID: 11181660
23. Olivetto IA, Bajdik CD, Ravdin PM, Speers CH, Coldman AJ, Norris BD, et al. Population-based validation of the prognostic model ADJUVANT! for early breast cancer. *J Clin Oncol* 2005 Apr 20; 23(12):2716–25. <https://doi.org/10.1200/JCO.2005.06.178> PMID: 15837986
24. Mook S, Schmidt MK, Rutgers EJ, van de Velde AO, Visser O, Rutgers SM, et al. Calibration and discriminatory accuracy of prognosis calculation for breast cancer with the online Adjuvant! program: a hospital-based retrospective cohort study. *Lancet Oncol* 2009 Nov; 10(11):1070–6. [https://doi.org/10.1016/S1470-2045\(09\)70254-2](https://doi.org/10.1016/S1470-2045(09)70254-2) PMID: 19801202
25. Italiaander MG NPKOeal. High B1 dutycycle in bilateral breast imaging at 7T. [Proceedings of the 20th Annual Meeting in ISMRM, Melbourne, Australia. 2012; p 1493]. 2014.
26. van der Velden TA, Italiaander M, van der Kemp WJ, Raaijmakers AJ, Schmitz AM, Luijten PR, et al. Radiofrequency configuration to facilitate bilateral breast P MR spectroscopic imaging and high-resolution MRI at 7 Tesla. *Magn Reson Med* 2014 Dec 17.
27. American College of Radiology. Breast Imaging Reporting and Data System (BI-RADS). 4th ed. Reston, Va: American College of Radiology.
28. van der Kemp WJ, Boer VO, Luijten PR, Stehouwer BL, Veldhuis WB, Klomp DW. Adiabatic multi-echo (3)(1)P spectroscopic imaging (AMESING) at 7 T for the measurement of transverse relaxation times and regaining of sensitivity in tissues with short T(2) values. *NMR Biomed* 2013 Oct; 26(10):1299–307. <https://doi.org/10.1002/nbm.2952> PMID: 23553945
29. Esserman L, Shieh Y, Thompson I. Rethinking screening for breast cancer and prostate cancer. *JAMA* 2009 Oct 21; 302(15):1685–92. <https://doi.org/10.1001/jama.2009.1498> PMID: 19843904
30. Schwartz GF, Hortobagyi GN, Masood S, Palazzo J, Holland R, Page D. Proceedings of the consensus conference on neoadjuvant chemotherapy in carcinoma of the breast, April 26–28, 2003, Philadelphia, PA. *Hum Pathol* 2004 Jul; 35(7):781–4.
31. Mieog JS, van der Hage JA, van de Velde CJ. Neoadjuvant chemotherapy for operable breast cancer. *Br J Surg* 2007 Oct; 94(10):1189–200. <https://doi.org/10.1002/bjs.5894> PMID: 17701939
32. Straver ME, Rutgers EJ, Russell NS, Oldenburg HS, Rodenhuis S, Wesseling J, et al. Towards rational axillary treatment in relation to neoadjuvant therapy in breast cancer. *Eur J Cancer* 2009 Sep; 45(13):2284–92. <https://doi.org/10.1016/j.ejca.2009.04.029> PMID: 19464164

33. Smith BD, Arthur DW, Buchholz TA, Haffty BG, Hahn CA, Hardenbergh PH, et al. Accelerated partial breast irradiation consensus statement from the American Society for Radiation Oncology (ASTRO). *J Am Coll Surg* 2009 Aug; 209(2):269–77. <https://doi.org/10.1016/j.jamcollsurg.2009.02.066> PMID: 19632605
34. Mook S, Van't Veer LJ, Rutgers EJ, Piccart-Gebhart MJ, Cardoso F. Individualization of therapy using Mammaprint: from development to the MINDACT Trial. *Cancer Genomics Proteomics* 2007 May; 4(3):147–55. PMID: 17878518
35. Cronin M, Sangli C, Liu ML, Pho M, Dutta D, Nguyen A, et al. Analytical validation of the Oncotype DX genomic diagnostic test for recurrence prognosis and therapeutic response prediction in node-negative, estrogen receptor-positive breast cancer. *Clin Chem* 2007 Jun; 53(6):1084–91. <https://doi.org/10.1373/clinchem.2006.076497> PMID: 17463177
36. McLaughlin R., & Hylton N. (2011). MRI in breast cancer therapy monitoring. *NMR in Biomedicine*, 24(6), 712–720. <https://doi.org/10.1002/nbm.1739> PMID: 21692116
